1 **Constraining oxygen consumption by nitrite oxidation in oceanic oxygen minimum zones**

2

3 Beman, J.M.<sup>1</sup>, S.M. Vargas<sup>1</sup>, J.M. Wilson<sup>1,2</sup>, E. Perez-Coronel<sup>1</sup>, S. Vazquez<sup>1</sup>, A. Yu<sup>1</sup>, A.E.  
4 Cairo<sup>1</sup>, J.S. Karolewski<sup>3</sup>, S.D. Wankel<sup>3</sup>

5

6 <sup>1</sup>Life and Environmental Sciences, University of California, Merced, Merced, CA, USA

7 <sup>2</sup>Scripps Institution of Oceanography, University of California, San Diego, CA, USA

8 <sup>3</sup>Marine Chemistry and Geochemistry, Woods Hole Oceanographic Institution, Woods Hole,  
9 MA, USA

10

11 **Corresponding author:** Prof. J. Michael Beman, Life and Environmental Sciences, University  
12 of California, Merced, 5200 North Lake Road, Merced, CA 95343, USA

13 **E-mail:** [jmbeman@gmail.com](mailto:jmbeman@gmail.com)

14 **Phone:** +1.650.823.7925

15

16 **Author Contributions**

17 J.M.B. designed the study and performed the research with S.M.V, J.M.W., E.P.C., S.V., A.Y.,  
18 A.C., and J.S.K.; S.D.W. contributed new analytical tools, and J.M.B. wrote the paper.

19

20 **Competing Interest Statement:** The authors have no competing interests.

21

22 **This PDF file includes:**

23 Main Text

24 Figures 1 to 5

25 Tables 1 to 2

26

27 **Main Text Word Count:** 5,282

28 **Reference Count:** 54

## 29 **Abstract**

30 Oceanic oxygen minimum zones (OMZs) occur where microorganisms deplete dissolved oxygen  
31 (DO) to exceptionally low levels, and are globally significant sites of biogeochemical cycling.  
32 Amid the intense competition for DO and other substrates occurring in these metabolically  
33 challenging environments, aerobic nitrite oxidation may consume significant amounts of DO, but  
34 this has not been examined comprehensively. Using parallel measurements of oxygen  
35 consumption rates and <sup>15</sup>N-nitrite oxidation rates applied to water column profiles and to oxygen  
36 manipulation experiments, we show that nitrite oxidation is a substantial sink for DO in the  
37 ocean's largest OMZ. The contribution of nitrite oxidation to overall DO consumption increased  
38 at low DO concentrations, tracking gradients and variations within and across multiple stations in  
39 the eastern tropical North Pacific Ocean. Oxygen manipulation experiments produced highly  
40 consistent effects, with nitrite oxidation responsible for progressively more DO consumption (up  
41 to 97%) as DO was experimentally decreased. Natural abundance stable isotope data indicated  
42 coupling of nitrite oxidation and nitrate reduction, while 16S rRNA and metagenome sequencing  
43 revealed that *Nitrospina* ecotypes possessing high-affinity cytochrome oxidase genes were  
44 prevalent and active within the OMZ. Collectively, our results demonstrate that nitrite oxidation  
45 consumes significant amounts of DO, and that this proportion increases as DO declines—  
46 indicating that nitrite oxidation is critically important to the formation and maintenance of  
47 OMZs.

48

49

## 50 **Significance**

51 Oceanic oxygen minimum zones (OMZs) are naturally-occurring regions of low oxygen found in  
52 select areas of the ocean. Lack of dissolved oxygen has important implications for both the  
53 distribution of marine organisms and global biogeochemical cycles, yet we have a limited  
54 understanding of how oxygen is depleted to such low levels. Here we comprehensively quantify  
55 the contribution of nitrite oxidation to oxygen depletion in the ocean's largest OMZ. We  
56 observed highly consistent patterns across depth profiles, and in multiple experiments where we  
57 manipulated oxygen concentrations, finding that nitrite oxidation consumes progressively more  
58 oxygen at lower oxygen concentrations. Our findings demonstrate that nitrite oxidation plays a  
59 pivotal role in exhausting oxygen to the low levels found in OMZs.

## 60 **Introduction**

61 Aerobic nitrite oxidation is pervasive throughout much of the oceanic water column, playing a  
62 central role in deep ocean chemoautotrophy and carbon cycling (1, 2), as well as in the oceanic  
63 nitrogen (N) cycle (3, 4). Nitrite oxidation rates are typically undetectable using  $^{15}\text{NO}_2^-$  isotopic  
64 tracer in the sunlit euphotic zone, peak at the base of the euphotic zone, and subsequently decline  
65 with depth (5). However, nitrite oxidation rate profiles deviate from this pattern in oceanic  
66 oxygen minimum zones (OMZs) that are depleted in dissolved oxygen (DO): rapid rates have  
67 been reported despite low DO concentrations (6–9), and nitrite oxidation itself may consume DO  
68 to low levels. OMZs are ultimately generated by high sinking fluxes of organic matter combined  
69 with reduced ventilation at depth, and are typically defined by DO concentrations  $<20 \mu\text{M}$  (10).  
70 Regions of the tropical oceans containing no measurable DO—termed anoxic marine zones  
71 (AMZs; ref. 11)—are further distinguished by the accumulation of nitrite to comparatively high  
72 ( $>1 \mu\text{M}$ ) concentrations (12). These secondary nitrite maxima (SNM) result from anaerobic  
73 nitrate reduction to nitrite under low DO (11–13). Accumulated nitrite may be subsequently  
74 reduced via denitrification and anaerobic ammonium oxidation (14)—or, alternatively, oxidized  
75 by NOB. Nitrite is therefore rapidly produced and consumed via multiple processes in OMZs,  
76 linking the oceans' N, carbon, and oxygen cycles.

77 Despite its centrality in OMZ biogeochemical cycles, nitrite oxidation is still poorly  
78 understood in these regions of the ocean. In particular, high rates of nitrite oxidation where DO  
79 levels are intrinsically low indicates that marine nitrite-oxidizing bacteria (NOB) may contribute  
80 substantially to DO depletion and the ultimate generation and maintenance of OMZs. However,  
81 this contribution to  $\text{O}_2$  drawdown has not been directly quantified. While nitrite oxidation has  
82 been measured in several OMZs (6–9), oxygen consumption rate (OCR) measurements in OMZs  
83 are rare (15). Yet simultaneous measurements are necessary to directly quantify the contribution  
84 of nitrite oxidation to oxygen consumption.

85 An additional distinguishing feature of AMZs is the presence of a deep chlorophyll  
86 maximum (DCM) where distinct ecotypes of the globally important cyanobacterium,  
87 *Prochlorococcus*, produce DO within low DO waters (16–18). DCM-based DO production can  
88 overlap with nitrite supply via nitrate reduction, but the degree to which nitrite oxidation (versus  
89 other processes) consumes DO in the DCM remains poorly constrained (18).

90 Our understanding of how NOB oxidize nitrite under low O<sub>2</sub> is also evolving. NOB gain  
91 energy by oxidizing nitrite to nitrate while using dissolved oxygen (DO) as a terminal electron  
92 acceptor. Adaptations to low DO are evident in different NOB, and both *Nitrospina* and  
93 *Nitrococcus* may contribute to varying degrees (19, 20). But although *in situ* nitrite oxidation  
94 rates are typically highest under low DO, experimental oxygen manipulations show the opposite  
95 pattern: declining rates with declining DO (21). This may be explained by variations in genomic  
96 content among different NOB that allow them to occupy distinct, highly-resolved DO niches  
97 throughout the water column (4, 7, 21)—including those that occur from the edge (20 μM) to the  
98 core (<5 nM) of OMZs. These details are essential to understand in the context of ocean  
99 deoxygenation, as seemingly small variations in DO may have significant biogeochemical  
100 implications if different ecotypes within different functional groups—such as nitrite oxidizers,  
101 nitrate reducers, and organisms respiring organic matter aerobically—have varying sensitivities  
102 to DO.

103 Here we address these open questions through parallel measurements of nitrite oxidation  
104 and overall OCR in the oceans' largest OMZ, the eastern tropical North Pacific Ocean (ETNP).  
105 Nitrite oxidation rate measurements (using <sup>15</sup>NO<sub>2</sub><sup>-</sup>), OCR measurements (using optical sensor  
106 spots), and ammonia oxidation rate measurements (using <sup>15</sup>NH<sub>4</sub><sup>+</sup>) were made along depth  
107 profiles at six stations in the ETNP, including three OMZ stations and three AMZ stations  
108 (Figure 1). At each station, we sampled in the upper 100 m to capture the primary nitrite  
109 maximum and an expected peak in nitrite oxidation rates at the base of the euphotic zone (EZ).  
110 We then sampled a range of DO values (from 200 μM to the anoxic SNM at AMZ stations) to  
111 quantify rate variations in response to vertical gradients in DO. How nitrite oxidation varies  
112 from the OMZ edge to its anoxic core is critical to our understanding of ocean biogeochemical  
113 cycles; we therefore conducted oxygen manipulation experiments and examined the response of  
114 nitrite oxidation and OCR. Combined with natural abundance stable isotope data, 16S rRNA  
115 sequences, and metagenomes, we show that nitrite oxidation is a substantial, and occasionally  
116 even dominant, sink for oxygen in the ETNP.

117

## 118 **Results and Discussion**

119 *Nitrite oxidation rates in the ETNP*

120 We sampled six stations in the ETNP OMZ with low ( $<20 \mu\text{M}$ ) DO concentrations at depth (Figs  
121 1 and 2). Three stations extending out from the coast of Mexico (Stations 1-3) were AMZ  
122 stations with distinct DCMs and accumulations of nitrite in SNMs indicative of anaerobic N  
123 cycling (Figure 2A and B). We expected that these would be hotspots of nitrite oxidation given  
124 oxygen supply via photosynthesis in the DCM overlapping with nitrite supply via nitrate  
125 reduction. Across all stations and depths, we observed the highest nitrite oxidation rates at the  
126 AMZ stations (Fig. 2C). Station 1 is located nearest the coast and had a shallow OMZ at the  
127 time of our sampling, with  $20 \mu\text{M}$  DO at 28 m depth, and nitrite  $> 1 \mu\text{M}$  at 100 m. Chlorophyll  
128 concentrations were also high in the upper water column (up to  $5 \text{ mg m}^{-3}$  at 20 m), with a DCM  
129 spanning 75-125 m. Nitrite oxidation displayed a local maximum at the base of the EZ at Station  
130 1 (20-30 m), and then increased to higher levels ( $>100 \text{ nmol L}^{-1} \text{ d}^{-1}$ ). This increase at 100 m  
131 corresponded with the overlap between the bottom of the DCM and the top of the SNM. Nitrite  
132 oxidation rates then reached higher values at 125 and 150 m within the SNM at Station 1.  
133 Stations 2 and 3 displayed similar nitrite oxidation rate profiles to each other, including elevated  
134 rates in the DCM and SNM. Nitrite oxidation rates were similar in magnitude, and peak values  
135 at the base of the EZ and in the OMZ were also similar ( $69\text{-}96 \text{ nmol L}^{-1} \text{ d}^{-1}$ ). Depth patterns  
136 tracked oceanographic differences across the three AMZ stations, as the depth of all features  
137 increased moving offshore from Station 1 to 2 to 3 (Fig. 2). For example, the DCM extended  
138 from 105-155 m at Station 2, while nitrite concentrations began to increase below 100 m; nitrite  
139 oxidation rates were elevated at 140 m and declined slightly with increasing depth. At Station 3,  
140 the DCM (120-180 m) and SNM ( $>140$  m) depths were deeper, and nitrite oxidation rates  
141 increased from 100 to 200 m.

142 In contrast to these three AMZ stations (Stations 1-3), rate profiles at Stations 4-6 showed  
143 peaks at the base of the EZ and decreases with depth, with no subsurface increase within the  
144 OMZ (*SI Appendix*, Figure S1). Parallel measurements of ammonia oxidation rates also showed  
145 this type of pattern at all stations (*SI Appendix*, Fig. S1). Subsurface maxima in ammonia  
146 oxidation tracked variations in the EZ across all six stations, but rates were not elevated in  
147 OMZ/AMZ waters—again contrasting with nitrite oxidation rate profiles at the AMZ stations.  
148 These data accord with earlier work in OMZs showing contrasting ammonia and nitrite oxidation  
149 rate profiles, and particularly high rates of nitrite oxidation in OMZ waters (6–8, 22-24).  
150 Elevated nitrite oxidation below the DCM ( $> 120$  m at Station 1,  $>155$  m at Station 2, and  $>180$

151 m at Station 3), where little to no DO is available, could have a number of possible explanations  
152 discussed below. Within the DCM, our data support the idea that nitrite oxidation contributes to  
153 ‘cryptic’ oxygen cycling (18)—i.e., that DO produced via oxygenic photosynthesis is rapidly  
154 consumed.

155

#### 156 *Oxygen consumption via nitrite oxidation*

157 We determined the contribution of nitrite oxidation to overall oxygen consumption via parallel  
158 measurements of oxygen consumption rates (OCR) using *in situ* optical sensor spots—which are  
159 non-invasive, compare favorably with other low-level measurement approaches, are the only  
160 cost-effective means of achieving of substantial replication, and for which sensitivity increases  
161 under low DO (25, 26). Decreases in DO were measured in both nitrite and ammonia oxidation  
162 rate sample bottles, as well as in three additional replicates, to leverage statistical power for  
163 increased sensitivity to low-level DO consumption (see Materials and Methods). Water column  
164 OCR profiles at all stations showed exponential declines with depth and decreasing DO  
165 concentrations (Fig. 2D and S1). OCR magnitudes were similar to the limited previous  
166 measurements that have been conducted in OMZs (e.g., 161-2600 nmol L<sup>-1</sup> d<sup>-1</sup> in ref 15). OCR  
167 also tracked variations in DO across stations, with progressively steeper declines in OCR with  
168 depth from Station 6 through Station 1. This pattern of declining OCR with increasing depth and  
169 decreasing DO contrasted with that of nitrite oxidation rates, which were notably elevated under  
170 low DO (Fig. 2).

171 OCR was not significantly different from zero at >125 m at Station 1 and >140 m at  
172 Stations 2 and 3, obviously owing to the initial lack of DO at these depths at the AMZ stations.  
173 However, typically 1-2 out of 5 replicates did contain DO introduced during sampling and  
174 incubation. Short of conducting *in situ* incubations, such DO contamination is essentially  
175 unavoidable. However, all microorganisms and metabolic processes exposed to DO may  
176 capitalize on its introduction and directly compete for DO. We directly compared nitrite  
177 oxidation rates with OCR, assuming that each mole of nitrite is oxidized using ½ mole of O<sub>2</sub> (5).  
178 (As the O added to nitrite to form nitrate comes from water, and <sup>15</sup>N is used to measure the rate,  
179 it is possible that oxidants other than DO are used; see below.) We found that nitrite oxidation  
180 increased as a proportion of overall OCR at lower DO levels (Figure 3A and B). Nitrite  
181 oxidation was responsible for up to 69% of OCR at Station 1, although most values were closer

182 to 10-40% at Stations 2 and 3 (Fig. 3). In contrast, ammonia oxidation contributed no more than  
183 5% in the OMZ (*SI Appendix*, Fig. S1).

184

#### 185 *Effects of oxygen manipulation experiments on nitrite oxidation and OCR*

186 These data indicate that NOB are poised to rapidly consume any DO introduced to sample  
187 bottles, although they may be partly affected by sample collection and manipulation. We  
188 therefore verified these observations by experimentally manipulating DO concentrations to  
189 measure the response of OCR, as well as  $^{15}\text{NO}_2^-$  nitrite oxidation rates, to changing DO (Figure  
190 4). We conducted experiments on the edge of the OMZ (depth of 20  $\mu\text{M}$  DO) at Stations 1-5, in  
191 the DCM at Stations 2 and 3, and in the SNM at Station 3 and an additional sampling Station 3.5  
192 (Table 1). (We could not conduct additional experiments at Stations 1 and 2 owing to a  
193 hurricane in the region at the time of sampling in 2018, and added Station 3.5 as a result.)  
194 Oxygen manipulations were designed to quantify nitrite oxidation and OCR across the spectrum  
195 of DO concentrations that occur from the OMZ edge to its core—rather than solely probing their  
196 lower limits—in order to constrain rate responses to changing DO within OMZs.

197 Oxygen manipulation experiments were consistent with water column profiles and  
198 provide additional evidence that nitrite oxidation can be a substantial oxygen sink. In all  
199 experiments, we found that OCR declined with experimentally decreased DO (Fig. 4). All  
200 curves displayed Michaelis-Menten type forms; however, we note that mixed assemblages of  
201 microorganisms drive this overall pattern by using DO to oxidize a variety of substrates. These  
202 substrates can include nitrite, as well as different forms of organic matter, reduced sulfur  
203 compounds, and possibly methane (27). Consistent with earlier work (21), nitrite oxidation rates  
204 also displayed Michaelis-Menten-type curves in most of our experiments (Fig. 4). However,  
205 nitrite oxidation rates were less sensitive to declining DO than OCR. Nitrite oxidation was  
206 therefore responsible for progressively higher proportion of overall OCR as DO was  
207 experimentally decreased (Fig. 3C). In fact, we found that 97% of OCR in the DCM at Station 2  
208 could be explained by measured nitrite oxidation rates, while most values were closer to 10-20%.  
209 This pattern in experiments was notably similar to results from rate profiles (Fig. 3B and C).

210 Based on these data, we calculated the DO level at which nitrite oxidation may be  
211 expected to consume all DO. As the data above indicate, this is obviously variable across  
212 experiments: our experiment in the DCM at Station 2 showed that nitrite oxidation can consume

213 essentially all available DO (Fig. 4 C), while the experiment with 20  $\mu\text{M}$  [DO] water at Station 2  
214 suggests that, even at low DO levels, nitrite oxidation would not consume all DO (Fig. 4B). We  
215 fit Michaelis-Menten-type curves to nitrite oxidation rates and OCR individually (Table 1;  
216 although these are, again, mixed microbial assemblages). Calculated DO affinities ( $K_s$  values)  
217 were substantially lower for nitrite oxidation compared with OCR, particularly in the DCM  
218 (Stations 2 and 3) and SNM (Stations 3 and 3.5). Based on these relationships, OCR always  
219 exceeds nitrite oxidation on the OMZ edge, but nitrite oxidation is estimated to consume all DO  
220 below concentrations of 35-96 nM in the SNM and DCM.

221         These data tie together multiple aspects of OMZ biogeochemistry into a coherent picture.  
222 Although nitrite oxidation rates decline as DO is experimentally decreased at individual depths—  
223 and so with particular assemblages of NOB—different depths/assemblages display different  
224 properties (Fig. 4). More importantly, this decline is always less severe for nitrite oxidation than  
225 for overall OCR (Figs. 2-4). NOB are therefore highly effective at scavenging low levels of DO  
226 (Figs. 3 and 4; (18), which is consistent with the idea of a nitrogen-oxygen feedback loop in  
227 OMZs driven partly by oxygen depletion via nitrite oxidation (28).

228

#### 229 *Isotopic, 16S rRNA, and metagenomic constraints on nitrite oxidation*

230 To further verify our findings, we applied natural abundance stable isotope measurements, 16S  
231 rRNA sequencing, and metagenome sequencing to water samples and nucleic acid samples  
232 collected in parallel with nitrite oxidation rate measurements (Figure 5). The dual N and O  
233 isotopic composition of dissolved nitrate ( $\delta^{15}\text{N}$  and  $\delta^{18}\text{O}$ , respectively; *SI Appendix* Fig. S2) is  
234 thought to provide an effective constraint on nitrite oxidation under low DO conditions due to  
235 isotopic ‘overprinting’ by nitrite oxidation (29, 30). While the respiratory reduction of nitrate  
236 (denitrification) leads to equal 1:1 increases in  $\delta^{15}\text{N}$  and  $\delta^{18}\text{O}$  (31, 32), deviations in 1:1 N:O  
237 isotope behavior arise from a decoupling of the N and O systems. These deviations are widely  
238 interpreted as reflecting cryptic re-oxidation of nitrite under low DO, where the reduction of  
239 nitrate to nitrite removes an O atom, and the subsequent re-oxidation of nitrite to nitrate appends  
240 a new O atom derived from ambient water (33, 34). Deviations from the 1:1 relationship are  
241 represented via  $\Delta(15,18)$  values (35), where more negative values represent larger departures  
242 from the 1:1 relationship.



243 At Stations 1-3, dual nitrate isotope values exhibited non-linear trends (Figure 5B and *SI*  
244 *Appendix* Fig. S3) that are consistent with isotopic overprinting by nitrite oxidation (29, 30).  
245  $\Delta(15,18)$  values were lowest (i.e., deviations were largest) at 50-150 m at Station 1, 100-140 m at  
246 Station 2, and 110-160 m at Station 3. The lower portions of these depth ranges overlapped with  
247 the upper portion of the DCM (75-125 m, 105-155 m, and 120-180 m, respectively) and tracked  
248 depth variations between stations. Peak deviations at Stations 1 and 2 were just above the DCM  
249 (75 and 100 m), while the peak at Station 3 corresponded closely with the DCM (140 m).  
250 Throughout these ETNP OMZ sites, our nitrate isotope data are consistent with previous  
251 observations and interpretations of rapid recycling between nitrate and nitrite (29, 35, 36),  
252 ultimately evidenced by isotopic overprinting of the nitrate reduction signal by nitrite oxidation.

253 16S rRNA gene and transcript sequencing revealed a similar pattern to rate profiles,  
254 experiments, and isotopic data, while also enabling identification of NOB that are abundant and  
255 active in the ETNP OMZ. Based on DNA, *Nitrospina* 16S rRNA amplicon sequence variants  
256 (ASVs; ref. 37) comprised up to 3.4-5.4% of all ASVs at Stations 1-3 (Fig. 5C), and relative  
257 abundances were strikingly consistent with the isotopic anomalies—abundances and anomalies  
258 were well-correlated ( $r^2=0.70-0.84$ ,  $P<0.05$ ) at Stations 1 and 3, for instance. These patterns  
259 were accentuated for RNA samples, but with discrete peaks in 16S rRNA transcripts generally  
260 occurring at deeper depths (Fig. 5D). *Nitrospina* 16S rRNA peaked at 125 m at Sta 1 (1.8% of  
261 all 16S rRNA transcripts; with an additional upper water column peak at 50 m), 140 m at Station  
262 2 (3.2%), and particularly 140-180 m at Station 3 (1.6-7.1%). All of these depths lie within the  
263 DCM at each station. Although 20 *Nitrospina* ASVs were identified, three were dominant (each  
264  $>1\%$  of all ASVs, together constituting 72-100% of all *Nitrospina* 16S rRNA gene sequences  
265 and transcripts). One of these ASVs was found only in OMZ samples at Stations 1-3, and was  
266 not detected above the OMZ or at Stations 4 and 5. This was also the lone ASV observed in the  
267 OMZ at Station 3, where *Nitrospina* were most active based on their comparatively high  
268 percentages of all 16S rRNA transcripts. In contrast, no *Nitrococcus* ASVs and only one low-  
269 abundance *Nitrospira* ASV were identified out of  $>11,000$  ASVs and  $>3.5$  million 16S  
270 sequences from 73 DNA and 73 RNA samples. In line with earlier work in the ETNP (7, 19),  
271 other OMZs (6, 38), and the variations in DO affinity observed across oxygen manipulation  
272 experiments (Fig. 4), these results indicate that particular *Nitrospina* ecotypes—and one ASV in

273 particular—are significant for low-oxygen nitrite oxidation, while other ASVs may be more  
274 important at different depths and DO concentrations.

275 To validate the genetic potential for nitrite oxidation by *Nitrospina* under low DO  
276 concentrations, we sequenced metagenomes collected on the OMZ edge, at the DCM, and within  
277 the OMZ core at Stations 1, 2, and 3. Nitrite oxidoreductase genes from *Nitrospina* were  
278 prevalent at all stations and depths, establishing the genomic potential for nitrite oxidation  
279 throughout the ETNP OMZ (Table 2). In addition, multiple high-affinity cytochrome C oxidase  
280 genes from *Nitrospina* were present in all samples—indicating that *Nitrospina* are capable of  
281 consuming DO at the low concentrations found within the OMZ. These genes were more  
282 common in DCM and SNM metagenomes than at the OMZ edge, consistent with *Nitrospina*  
283 ecotype distributions, and with the lower DO concentrations found at the DCM and SNM.  
284 Cytochrome *bd*-type oxidase genes from *Nitrospina* were also detected in all metagenomes  
285 except the OMZ edge sample at Station 1, although these lack quinol binding sites and may not  
286 functional as canonical oxidases (19, 39). Sun et al. (19) also suggested that chlorite dismutase  
287 genes may be relevant for anaerobic metabolism in *Nitrospina*, and these were present in all  
288 metagenomes. Finally, *Prochlorococcus* genes were prevalent from the OMZ edge to core, and  
289 especially within the DCM, supporting the idea that oxygenic photosynthesis and cryptic oxygen  
290 cycling occur throughout the ETNP OMZ. Overall, metagenomic data are consistent with  
291 experimental data and 16S data, and indicate *Nitrospina* are tightly tuned to DO concentrations in  
292 the ETNP.

293

#### 294 *Oxygen consumption by nitrite oxidation in OMZs*

295 Assembled together, our results provide a comprehensive view of nitrite oxidation and its  
296 contribution to oxygen consumption in the ocean's largest OMZ. Rate measurements, oxygen  
297 manipulation experiments, stable isotopic data, and molecular data all converge on the fact that  
298 nitrite oxidation is active from the base of the euphotic zone into the OMZ. Nitrite oxidation was  
299 particularly significant within the DCM at Stations 1-3: nitrite oxidation rates were elevated,  
300 isotopic overprinting of nitrate by nitrite oxidation was evident, and *Nitrospina* were abundant  
301 and active (Fig. 2C and 5). All of these data tracked consistent progression in the depth of the  
302 DCM across stations, and indicate that nitrite oxidation is important for DO  
303 utilization in the DCM. Based on rate profiles, nitrite oxidation ranged from 10-47% of OCR in

304 the DCM, while experiments indicate maximum percentages of 13-97% (Fig. 3B and 3C).  
305 Stations 4-6—which lack a DCM and SNM—provide a notable contrast, as do ammonia  
306 oxidation rate profiles (Fig. S1).

307 Peaks in the magnitude of departure from a 1:1 nitrate reduction signal (e.g., isotopic  
308 overprinting by nitrite oxidation), and in *Nitrospina* ASV abundances, further indicate that nitrite  
309 oxidation is active above and below the DCM (Fig. 5). At Stations 2 and 3, nitrite oxidation  
310 rates above the DCM were similar to rates deeper in the water column. Station 1, in contrast,  
311 showed a rate increase within the AMZ. While rate measurements may reflect consumption of  
312 introduced DO, *Nitrospina* 16S rRNA transcripts increased in relative abundance within the  
313 AMZ. RNA samples were collected from the CTD rosette and rapidly filtered, so if these data  
314 capture a response to oxygen exposure, this response is exceptionally rapid and consistent.  
315 Alternatively, these data indicate that *Nitrospina* are active within the AMZ. One possibility is  
316 that *Nitrospina* survive anaerobically for periods of time until provided DO (40). Alternative  
317 oxygen-evolving mechanisms from nitrite have also been proposed for anaerobic methane-  
318 oxidizing bacteria (41) that are active in OMZs (42). Finally, the presence of *Prochlorococcus*  
319 below the DCM may allow low-level DO production via oxygenic photosynthesis (Table 2).  
320 Regardless of the mechanism, isotopic data and 16S rRNA data are consistent with transient  
321 nitrite oxidation coupled to nitrate reduction below the DCM.

322 However, our primary focus was on oxygen consumption via nitrite oxidation and its  
323 implications for the formation, maintenance, and expansion of OMZs. Two clear and consistent  
324 patterns emerged from both water column profiles and oxygen manipulation experiments: (i)  
325 overall OCR declined with decreasing DO in profiles and experiments, while (ii) nitrite oxidation  
326 increased as a proportion of OCR as DO declined in both profiles and experiments (Fig. 3B and  
327 3C and 4). Variation in the proportion of OCR explained by nitrite oxidation from depth to  
328 depth and experiment to experiment was superimposed on these two patterns. Nitrite oxidation  
329 was significant throughout the OMZ and experiments—typically ranging from 10-40% of  
330 OCR—and sometimes dominant. For example, nitrite oxidation responded rapidly to introduced  
331 DO in the SNM at Station 1, and evidently consumed all DO produced in the DCM at Station 2.

332 Variation in the proportion of overall OCR attributable to nitrite oxidation could reflect  
333 fluctuations through time (28), as well as differences in substrate availabilities and affinities  
334 relative to DO for different processes consuming DO. Other than nitrite oxidation, aerobic

335 respiration of organic matter is probably most significant for OCR given relative substrate  
336 concentrations (organic C > CH<sub>4</sub> or reduced S compounds; refs. 42–44), as well as high affinities  
337 for DO among heterotrophic bacteria (45–47). Notably, many aerobic heterotrophs are also  
338 facultatively anaerobic, switching to nitrate reduction under low DO (13, 48). Along with a  
339 general decline in aerobic respiration rates with decreasing DO, this switch to nitrate reduction  
340 may explain the steep declines in OCR that we observed in our experimental data. Production of  
341 nitrite from nitrate reduction may also jumpstart nitrite oxidation, and is consistent with isotopic  
342 data. We suggest that such cryptic nitrite/nitrate cycling may explain the adaptations of  
343 particular *Nitrospina* ASVs to AMZs: although these are low-DO environments, they are also  
344 high-nitrite environments, representing a trade-off in the availability of electron donor and  
345 acceptor. The costs of life at low DO may be offset by the advantages of consistently elevated  
346 nitrite concentrations.

347 In line with this idea, we found that the proportion of DO consumed by nitrite oxidation  
348 increased at progressively lower DO concentrations in both profiles and experiments (Fig. 3B  
349 and C). This consistent pattern demonstrates that nitrite oxidation increases in relative  
350 importance as DO declines, and suggests that nitrite oxidation may play a critical role in the shift  
351 from low oxygen (an OMZ) to functional anoxia (an AMZ). Moreover, our results indicate that  
352 nitrite oxidation is carried out by just a few *Nitrospina* ASVs—in contrast with the diversity of  
353 other microbial groups that may be involved in overall oxygen consumption (4, 49). Put another  
354 way, even when nitrite oxidation represents a relatively modest proportion of OCR, just one to  
355 three ASVs may be responsible for this contribution to overall oxygen consumption. *Nitrospina*  
356 are therefore instrumental in DO consumption, and disproportionately important as DO declines.  
357 When coupled to nitrate reduction, this could result in an oxygen consumption feedback loop  
358 fueled by cryptic nitrite/nitrate cycling. Rate profiles, oxygen manipulation experiments, natural  
359 abundance measurements, 16S rRNA sequencing, and metagenomic data all favor this idea: as  
360 DO declines, OCR decreases precipitously while nitrite oxidation does not; the low-oxygen  
361 adaptations of particular *Nitrospina* support high abundances and activity; and isotopic  
362 anomalies are consistent with strong coupling between nitrite oxidation and nitrate reduction.  
363 Our data convincingly establish that nitrite oxidation is pivotal in oxygen and nitrogen cycling in  
364 OMZs, and so central in the creation and maintenance of these biogeochemically-important  
365 regions of the ocean.

366

## 367 **Materials and Methods**

368 **Sample Collection.** Samples were collected in April 2017 and June 2018 aboard the *R/V*  
369 *Oceanus*. At each station, conductivity/salinity, temperature, depth, pressure, chlorophyll  
370 fluorescence, and photosynthetically active radiation (PAR) were measured by a SeaBird SBE-  
371 9plus CTD, SBE-3F temperature sensor, SBE-43 DO sensor, WetLabs ECO-FLR Fluorometer,  
372 and Biospherical QCP2200 PAR sensor. Initial casts were used to measure DO and nutrient  
373 profiles to guide subsequent sampling. Nutrient samples were analyzed for  $\text{NH}_4^+$  and  $\text{NO}_2^-$   
374 aboard the ship, with additional shore-based analyses of combined  $\text{NO}_3^- + \text{NO}_2^-$  and  $\text{PO}_4^{3-}$  at the  
375 University of California Santa Barbara Marine Science Institute Analytical Lab (*SI Appendix*,  
376 *Supplementary Materials and Methods*).

377 At all stations, water samples were collected in the upper 100 m to capture variation in  
378 the upper water column, and we then sampled across a range of DO levels and nitrite levels to  
379 capture variation in the OMZ. Samples were collected at 200, 100, 50, 20, 10, 5, and 1  $\mu\text{M}$  [DO]  
380 at all stations. Because the OMZ is shallower and more intense moving south and nearshore in  
381 the ETNP (Fig. 1), these DO levels can occur within the upper 100 m, such that upper 100 m and  
382 DO-based sampling overlapped. This overlap was greater at Station 1, followed by 2 and 3. At  
383 these AMZ stations, samples were also collected at three depths between the 1  $\mu\text{M}$  [DO] level  
384 and the SNM.

385

386 **OCR Measurements and Oxygen Manipulations.** Two types of sensor spots were used to  
387 measure OCR and manipulate DO, one with a wider range and detection limit of 100 nM (Fibox,  
388 Loligo Systems, Viborg, Denmark), as well as trace-level spots with a detection limit of 10 nM  
389 (FireSting, Pyroscience, Aachen, Germany) (26). Loligo sensor spots were used for water  
390 column profiles given the wider DO range, while FireSting trace-level spots were used to  
391 establish deoxygenation experiments and measure OCR within them. Optical sensors were  
392 calibrated using DO-saturated water and sodium sulfite-saturated and He-purged water. On the  
393 upper end, Fibox sensor spot DO measurements were highly correlated with CTD DO values  
394 ( $r^2=0.996$ , slope=0.997) for  $[\text{DO}] > 1 \mu\text{M}$ . On the lower end, we regularly checked the '0 nM'  
395 concentration with repeated measurements of sodium sulfite-saturated water and He-purged  
396 water, and our lowest values measured in experiments were consistently within 5 nM of 0. In

397 both profiles and experiments, OCR was measured as the linear decrease in DO over the course  
398 of experiments (25, 50). Experiments were conducted for 24 hours in the dark in a cold van  
399 adjusted to ambient temperature, with separate incubations (and therefore temperatures)  
400 conducted for samples from the upper 100 m, for oxygen/nitrite-based sampling, and for  
401 deoxygenation experiments at each station.

402 Water column profiles of OCR were measured using 5 replicates at each depth, including  
403 one each with tracer level (5-10% *in situ* concentration measured at sea) addition of  $^{15}\text{NH}_4^+$  or  
404  $^{15}\text{NO}_2^-$  to measure ammonia/nitrite oxidation (see below). Loligo sensor spots were attached to  
405 the inside of 300 mL Wheaton BOD glass bottles using silicone glue prior to the cruise. At sea,  
406 bottles were filled to at least three times overflowing via slow laminar flow, were rapidly capped  
407 and transferred to the cold van, and initial DO measurements were made. After incubation,  
408 endpoint DO measurements were made and then 50 mL samples from relevant bottles were  
409 frozen for nitrite and ammonia oxidation rate measurements.

410 Oxygen manipulation experiments were conducted in 500 mL serum bottles with  
411 attached FireSting sensor spots. For each experiment, a total of 24 bottles were filled with water  
412 collected at a specific depth, sealed, and then bubbled with ultrapure He gas while DO was  
413 monitored. 8 bottles had tracer-level  $^{15}\text{NO}_2^-$  additions, 8 bottles had tracer-level  $^{15}\text{NH}_4^+$   
414 additions, and 8 were unlabeled. In each set of 8 bottles, we established initial DO values  
415 typically ranging from 10s to 1000s of nM (Figure 4). OCR was measured in all bottles based on  
416 starting and ending DO values, and samples for nitrite oxidation were collected from  $^{15}\text{NO}_2^-$   
417 labeled bottles at the end of the experiments. For all experiments, dedicated bottles were used  
418 for the different  $^{15}\text{N}$  labels.

419  
420 **Nitrate isotopic measurements.** Both natural abundance and  $^{15}\text{N}$ -tracer-based nitrate isotopes  
421 were quantified by use of the denitrifier method (51, 52), in which 20-30 nmoles of  $\text{NO}_3^-$  were  
422 quantitatively converted to  $\text{N}_2\text{O}$  by a culture of the denitrifying bacterium, *Pseudomonas*  
423 *aureofaciens*. Product  $\text{N}_2\text{O}$  was cryogenically purified and trapped under flow of ultra-high  
424 purity He, before being introduced to an IsoPrime 100 isotope ratio mass spectrometer. Isotope  
425 ratios were normalized to international reference materials (USGS 32, USGS 34, USGS 35) and  
426 reported using standard delta notation. Any nitrite present in the sample was removed by  
427 addition of sulfamic acid (31). In samples from the upper 100 m, where  $\text{NO}_3^-$  concentrations

428 were low, ‘carrier’  $\text{NO}_3^-$  of known isotopic composition was added and sample compositions  
429 were calculated by mass balance. Precision of natural abundance isotope ratio measurements  
430 was  $\pm 0.3\%$  and  $\pm 0.4\%$  for  $\delta^{15}\text{N}$  and  $\delta^{18}\text{O}$ , respectively.  $\delta^{15}\text{N}$  and  $\delta^{18}\text{O}$  values were used to  
431 calculate the  $\Delta(15,18)$  deviation from the 1:1 line following Sigman et al. (35).

432  
433 **Nitrite Oxidation Rates.** Nitrite oxidation rates were measured by adding 98 atom percent  
434 (atom%)  $^{15}\text{NO}_2^-$  to a final concentration of 12-184  $\text{nmol L}^{-1}$ —representing 5-10% of *in situ*  $\text{NO}_2^-$   
435 concentrations (with the exception of some samples in the upper 100m with no measurable  
436 nitrite)—and measuring the accumulation of  $^{15}\text{N}$  label in the  $\text{NO}_3^-$  pool following Beman et al.  
437 (7). After incubation for ~24 hours, samples were frozen at sea. Upon thawing in the laboratory,  
438 excess  $^{15}\text{NO}_2^-$  was removed following Granger and Sigman (31). In brief, sulfamic acid (~8-10  
439  $\mu\text{L mL}^{-1}$ ) was added, the samples were shaken and allowed to sit for >5 minutes, and then  
440 samples were neutralized by adding NaOH (4 M, ~11  $\mu\text{L mL}^{-1}$ ) prior to analysis.

441 Rates of  $^{15}\text{NO}_2^-$  oxidation ( $^{15}R_{ox}$ ) were calculated using equation 1 from Beman et al. (7)  
442 adapted from Ward et al. (53):

$$443 \quad {}^{15}R_{ox} = \frac{(n_t - n_{o\text{NO}_3^-}) \times [\text{NO}_3^-]}{(n_{\text{NO}_2^-}) \times t} \quad (1)$$

444 where  $n_t$  is the atom%  $^{15}\text{N}$  in  $\text{NO}_3^-$  measured at time  $t$ ,  $n_{o\text{NO}_3^-}$ , is the measured atom%  $^{15}\text{N}$  of  
445 unlabeled  $\text{NO}_3^-$ ,  $[\text{NO}_3^-]$  is the concentration of the  $\text{NO}_3^-$  pool, and  $n_{\text{NO}_2^-}$  is the exponential  
446 average atom% of  $\text{NO}_2^-$  over time  $t$ .  $n_{\text{NO}_2^-}$  was calculated by isotope mass balance based on  
447 initial  $\text{NO}_2^-$  concentrations, measured isotopic composition, added  $^{15}\text{N}$ -labeled  $\text{NO}_2^-$ , and  
448 measured  $^{15}\text{NH}_4^+$  oxidation rates (which produce unlabeled  $\text{NO}_2^-$ ; ammonia oxidation rate  
449 measurements followed Beman et al. (23)).

450  
451 **RNA/DNA Extractions, 16S rRNA Sequencing and Analysis, and Metagenome Sequencing**  
452 **and Analysis** are reported in the *SI Appendix, Supplementary Materials and Methods*.

453  
454 **Sequence data** are available in the Sequence Read Archive under BioProjects PRJNA192803  
455 (16S data), and PRJNA634212 (metagenomes).

456

457 **Statistical analyses** were carried out in the R statistical environment (RStudio Version 1.0.136).  
458 Linear regressions were performed using the ‘lm’ function in R; Michaelis-Menten curve fits  
459 were performed using the ‘drm’ function in the R package drc (54).

460

#### 461 **Acknowledgments**

462 This work was supported by NSF CAREER grant OCE-1555375 to J.M.B. Metagenome  
463 sequencing was supported by the UCMEXUS-CONACyT Collaborative Grants Program (to  
464 J.M.B. and José García Maldonado). We thank the officers and crew of the *R/V Oceanus* for  
465 their help at sea, and thank Sarah Abboud, Daniela Alonso, DeVonyo Bills, Jorge Montiel  
466 Molina, and Kevin Testo for their assistance in the field.

467

#### 468 **References**

- 469 1. M. G. Pachiadaki, *et al.*, Major role of nitrite-oxidizing bacteria in dark ocean carbon  
470 fixation. *Science* **358**, 1046–1051 (2017).
- 471 2. M. A. Saito, *et al.*, Abundant nitrite-oxidizing metalloenzymes in the mesopelagic zone of  
472 the tropical Pacific Ocean. *Nat. Geosci.* **13**, 355–362 (2020).
- 473 3. C. A. Francis, J. M. Beman, M. M. M. Kuypers, New processes and players in the  
474 nitrogen cycle: The microbial ecology of anaerobic and archaeal ammonia oxidation.  
475 *ISME J.* **1**, 19–27 (2007).
- 476 4. A. D. Bertagnolli, F. J. Stewart, Microbial niches in marine oxygen minimum zones. *Nat.*  
477 *Rev. Microbiol.* **16**, 723–729 (2018).
- 478 5. B.B. Ward, "Nitrification in Marine Systems" in Nitrogen in the Marine Environment, 2nd  
479 Ed., D. Capone, D. Bronk, M. R. Mulholland, E. Carpenter, Eds. (Elsevier Inc., 2008), pp.  
480 199-263.
- 481 6. J. Füssel, *et al.*, Nitrite oxidation in the Namibian oxygen minimum zone. *ISME J.* **6**,  
482 1200–1209 (2012).
- 483 7. J. M. Beman, J. Leilei Shih, B. N. Popp, Nitrite oxidation in the upper water column and  
484 oxygen minimum zone of the eastern tropical North Pacific Ocean. *ISME J.* **7**, 2192-2205  
485 (2013) <https://doi.org/10.1038/ismej.2013.96>.
- 486 8. X. Peng, *et al.*, Ammonia and nitrite oxidation in the Eastern Tropical North Pacific.  
487 *Global Biogeochem. Cycles* **29**, 2034–2049 (2015).



- 488 9. X. Sun, Q. Ji, A. Jayakumar, and B.B Ward, Dependence of nitrite oxidation on nitrite  
489 and oxygen in low-oxygen seawater. *Geophysical Res. Lett.* **44**, 7883-7891 (2017).
- 490 10. A. Paulmier, D. Ruiz-Pino, Oxygen minimum zones (OMZs) in the modern ocean. *Prog.*  
491 *Oceanogr.* **80**, 113–128 (2009).
- 492 11. O. Ulloa, D. E. Canfield, E. F. DeLong, R. M. Letelier, F. J. Stewart, Microbial  
493 oceanography of anoxic oxygen minimum zones. *Proc. Natl. Acad. Sci. U. S. A.* **109**,  
494 15996–16003 (2012).
- 495 12. B. Thamdrup, T. Dalsgaard, N. P. Revsbech, Widespread functional anoxia in the oxygen  
496 minimum zone of the Eastern South Pacific. *Deep. Res. Part I Oceanogr. Res. Pap.* **65**,  
497 36–45 (2012).
- 498 13. D. Tsementzi, *et al.*, SAR11 bacteria linked to ocean anoxia and nitrogen loss. *Nature*  
499 **536**, 179–183 (2016).
- 500 14. A. R. Babbin, R. G. Keil, A. H. Devol, B. B. Ward, Organic matter stoichiometry, flux,  
501 and oxygen control nitrogen loss in the ocean. *Science* **344**, 406–408 (2014).
- 502 15. T. Kalvelage, *et al.*, Aerobic Microbial Respiration In Oceanic Oxygen Minimum Zones.  
503 *PLoS One* **10**, e0133526 (2015).
- 504 16. R. Goericke, R. J. Olson, A. Shalapyonok, A novel niche for *Prochlorococcus* sp. in low-  
505 light suboxic environments in the Arabian Sea and the Eastern Tropical North Pacific.  
506 *Deep. Res. Part I Oceanogr. Res. Pap.* **47**, 1183–1205 (2000).
- 507 17. P. Lavín, B. González, J. F. Santibáñez, D. J. Scanlan, O. Ulloa, Novel lineages of  
508 *Prochlorococcus* thrive within the oxygen minimum zone of the eastern tropical South  
509 Pacific. *Environ. Microbiol. Rep.* **2**, 728–738 (2010).
- 510 18. E. Garcia-Robledo, *et al.*, Cryptic oxygen cycling in anoxic marine zones. *Proc. Natl.*  
511 *Acad. Sci. U. S. A.* **114**, 8319–8324 (2017).
- 512 19. X. Sun, *et al.*, Uncultured Nitrospina-like species are major nitrite oxidizing bacteria in  
513 oxygen minimum zones. *ISME J.* **13**, 2391–2402 (2019).
- 514 20. J. Füssel, *et al.*, Adaptability as the key to success for the ubiquitous marine nitrite  
515 oxidizer *Nitrococcus*. *Sci. Adv.* **3**, e1700807 (2017).
- 516 21. L. A. Bristow, *et al.*, Ammonium and nitrite oxidation at nanomolar oxygen  
517 concentrations in oxygen minimum zone waters. *Proc. Natl. Acad. Sci. U. S. A.* **113**,  
518 10601–10606 (2016).

- 519 22. P. Lam, *et al.*, Revising the nitrogen cycle in the Peruvian oxygen minimum zone. *Proc.*  
520 *Natl. Acad. Sci. U. S. A.* **106**, 4752-7 (2009).
- 521 23. J. M. Beman, B. N. Popp, S. E. Alford, Quantification of ammonia oxidation rates and  
522 ammonia-oxidizing archaea and bacteria at high resolution in the Gulf of California and  
523 eastern tropical North Pacific Ocean. *Limnol. Oceanogr.* **57**, 711–726 (2012).
- 524 24. F. Lipschultz, *et al.*, Bacterial transformations of inorganic nitrogen in the oxygen-  
525 deficient waters of the Eastern Tropical South Pacific Ocean. *Deep Sea Res. Part A,*  
526 *Oceanogr. Res. Pap.* **37**, 1513–1541 (1990).
- 527 25. M. Holtappels, *et al.*, Aquatic respiration rate measurements at low oxygen  
528 concentrations. *PLoS One* **9** (2014).
- 529 26. P. Lehner, *et al.*, LUMOS - A sensitive and reliable optode system for measuring  
530 dissolved oxygen in the nanomolar range. *PLoS One* **10**, 1–15 (2015).
- 531 27. W. F. Gilly, J. M. Beman, S. Y. Litvin, B. H. Robison, Oceanographic and Biological  
532 Effects of Shoaling of the Oxygen Minimum Zone. *Ann. Rev. Mar. Sci.* **5**, 393–420  
533 (2013).
- 534 28. J. L. Penn, T. Weber, B. X. Chang, C. Deutsch, Microbial ecosystem dynamics drive  
535 fluctuating nitrogen loss in marine anoxic zones. *Proc. Natl. Acad. Sci. U. S. A.* **116**,  
536 7220–7225 (2019).
- 537 29. J. Granger, S. D. Wankel, Isotopic overprinting of nitrification on denitrification as a  
538 ubiquitous and unifying feature of environmental nitrogen cycling. *Proc. Natl. Acad. Sci.*  
539 *U. S. A.* **113**, E6391–E6400 (2016).
- 540 30. K. L. Casciotti, Nitrogen and Oxygen Isotopic Studies of the Marine Nitrogen Cycle. *Ann.*  
541 *Rev. Mar. Sci.* **8**, 379–407 (2016).
- 542 31. J. Granger J and D.M. Sigman. Removal of nitrite with sulfamic acid for nitrate N and O  
543 isotope analysis with the denitrifier method. *Rapid Commun. Mass Spectrom.* **23**, 3753–  
544 3762 (2009).
- 545 32. L. A. Treibergs, J. Granger, Enzyme level N and O isotope effects of assimilatory and  
546 dissimilatory nitrate reduction. *Limnol. Oceanogr.* **62**, 272–288 (2017).
- 547 33. C. Buchwald, K. L. Casciotti, Oxygen isotopic fractionation and exchange during bacterial  
548 nitrite oxidation. *Limnol. Oceanogr.* **55**, 1064–1074 (2010).
- 549 34. T. C. Hollocher, Source of the oxygen atoms of nitrate in the oxidation of nitrite by

- 550 Nitrobacter agilis and evidence against a PON anhydride mechanism in oxidative  
551 phosphorylation. *Arch. Biochem. Biophys.* **233**, 721–727 (1984).
- 552 35. D. M. Sigman, *et al.*, Coupled nitrogen and oxygen isotope measurements of nitrate along  
553 the eastern North Pacific margin. *Global Biogeochem. Cycles* **19**, GB4022 (2005).
- 554 36. K. L. Casciotti, M. R. McIlvin, Isotopic analyses of nitrate and nitrite from reference  
555 mixtures and application to Eastern Tropical North Pacific waters. *Mar. Chem.* **107**, 184–  
556 201 (2007).
- 557 37. B. J. Callahan, *et al.*, DADA2: High-resolution sample inference from Illumina amplicon  
558 data. *Nat. Methods* **13**, 581–583 (2016).
- 559 38. J. J. Wright, K. M. Konwar, S. J. Hallam, Microbial ecology of expanding oxygen  
560 minimum zones. *Nat. Rev. Microbiol.* **10**, 381–394 (2012).
- 561 39. S. Lücker, B. Nowka, T. Rattei, E. Spieck, H. Daims, The genome of Nitrospina gracilis  
562 illuminates the metabolism and evolution of the major marine nitrite oxidizer. *Front.*  
563 *Microbiol.* **4**, 27 (2013).
- 564 40. H. Daims, S. Lücker, M. Wagner, A New Perspective on Microbes Formerly Known as  
565 Nitrite-Oxidizing Bacteria. *Trends Microbiol.* **24**, 699–712 (2016).
- 566 41. K. F. Ettwig, *et al.*, Nitrite-driven anaerobic methane oxidation by oxygenic bacteria.  
567 *Nature* **464**, 543–548 (2010).
- 568 42. B. Thamdrup, *et al.*, Anaerobic methane oxidation is an important sink for methane in the  
569 ocean’s largest oxygen minimum zone. *Limnol. Oceanogr.* **64**, 2569–2585 (2019).
- 570 43. D. E. Canfield, *et al.*, A Cryptic Sulfur Cycle in Oxygen-Minimum-Zone Waters off the  
571 Chilean Coast. *Science* **330**, 1375–1378 (2010).
- 572 44. F. J. Pavia, *et al.*, Shallow particulate organic carbon regeneration in the South Pacific  
573 Ocean. *Proc. Natl. Acad. Sci. U. S. A.* **116**, 9753–9758 (2019).
- 574 45. D. A. Stolper, N. P. Revsbech, D. E. Canfield, Aerobic growth at nanomolar oxygen  
575 concentrations. *Proc. Natl. Acad. Sci. U. S. A.* **107**, 18755–18760 (2010).
- 576 46. R. L. Morris, T. M. Schmidt, Shallow breathing: Bacterial life at low O<sub>2</sub>. *Nat. Rev.*  
577 *Microbiol.* **11**, 205–212 (2013).
- 578 47. E. J. Zakem, M. J. Follows, A theoretical basis for a nanomolar critical oxygen  
579 concentration. *Limnol. Oceanogr.* **62**, 795–805 (2017).
- 580 48. C. Deutsch, H. Brix, T. Ito, H. Frenzel, L. A. Thompson, Climate-forced variability of

- 581 ocean hypoxia. *Science* **333**, 336–339 (2011).
- 582 49. J.M. Beman, J.M. and M.T. Carolan, Deoxygenation alters bacterial diversity and  
583 community composition in the ocean’s largest oxygen minimum zone. *Nature Comm.* **4**,  
584 1-11 (2013).
- 585 50. J. M. Wilson, S. Y. Litvin, J. M. Beman, Microbial community networks associated with  
586 variations in community respiration rates during upwelling in nearshore Monterey Bay,  
587 California. *Environ. Microbiol. Rep.* **10**, 272–282 (2018).
- 588 51. K. L. Casciotti, D. M. Sigman, M. G. Hastings, J. K. Böhlke, A. Hilkert, Measurement of  
589 the oxygen isotopic composition of nitrate in seawater and freshwater using the denitrifier  
590 method. *Anal. Chem.* **74**, 4905–4912 (2002).
- 591 52. D. M. Sigman, *et al.*, A bacterial method for the nitrogen isotopic analysis of nitrate in  
592 seawater and freshwater. *Anal. Chem.* **73**, 4145–4153 (2001).
- 593 53. B. B. Ward, K. A. Kilpatrick, E. H. Renger, R. W. Eppley, Biological nitrogen cycling in  
594 the nitracline. *Limnol. Oceanogr.* **34**, 493–513 (1989).
- 595 54. C. Ritz, F. Baty, J. C. Streibig, D. Gerhard, Dose-response analysis using R. *PLoS One* **10**  
596 (2015).
- 597
- 598

599 **Figures (for initial submission)**

600

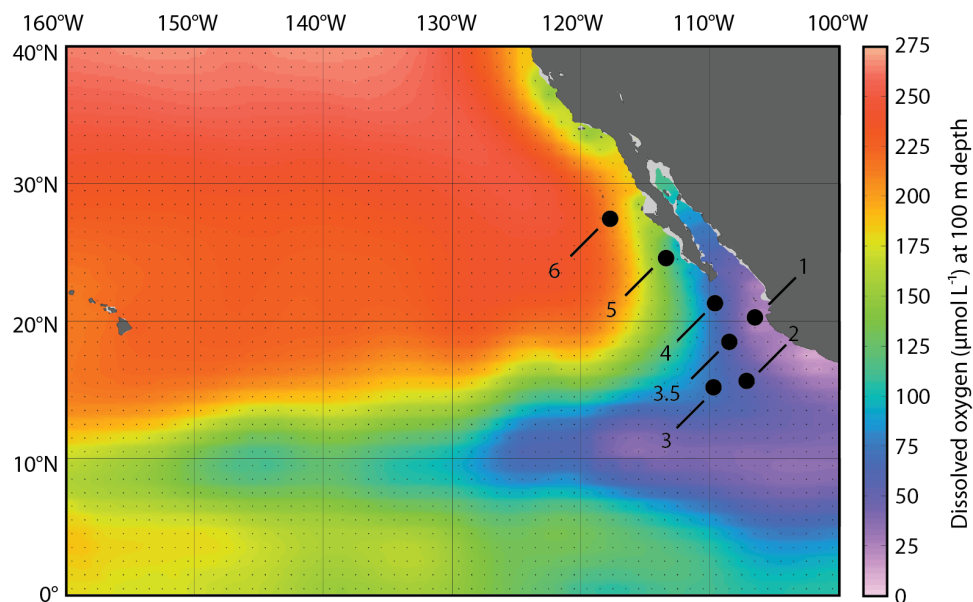

601

602

603 **Figure 1:** Station locations (numbered black circles) in the ETNP plotted on dissolved oxygen  
604 concentrations (in  $\mu\text{M}$ ) at 100 m depth from the World Ocean Atlas.

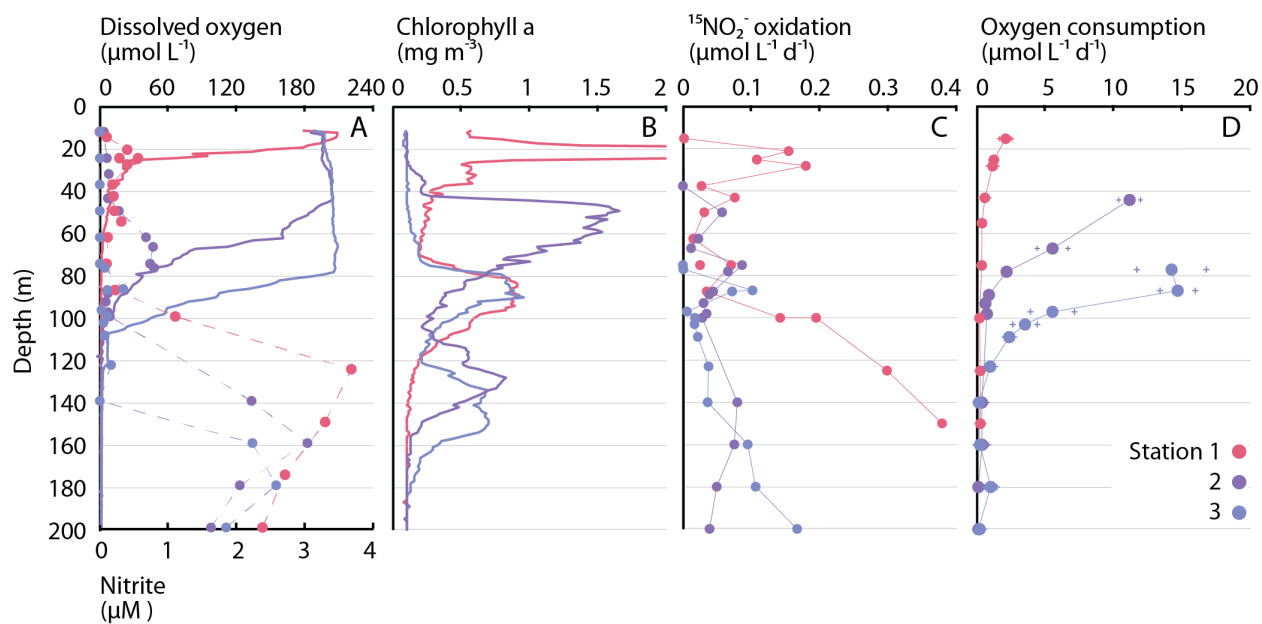

605

606

607 **Figure 2:** Depth profiles of (A) DO (solid lines) and nitrite (data points connected by dashed  
608 lines), (B) chlorophyll a, (C) nitrite oxidation rates, and (D) OCR (error bars denote standard  
609 deviation of five replicates) show consistent variation across Stations 1-3 (denoted by different  
610 colors). Maximum chlorophyll values at Station 1 plot off-axis.

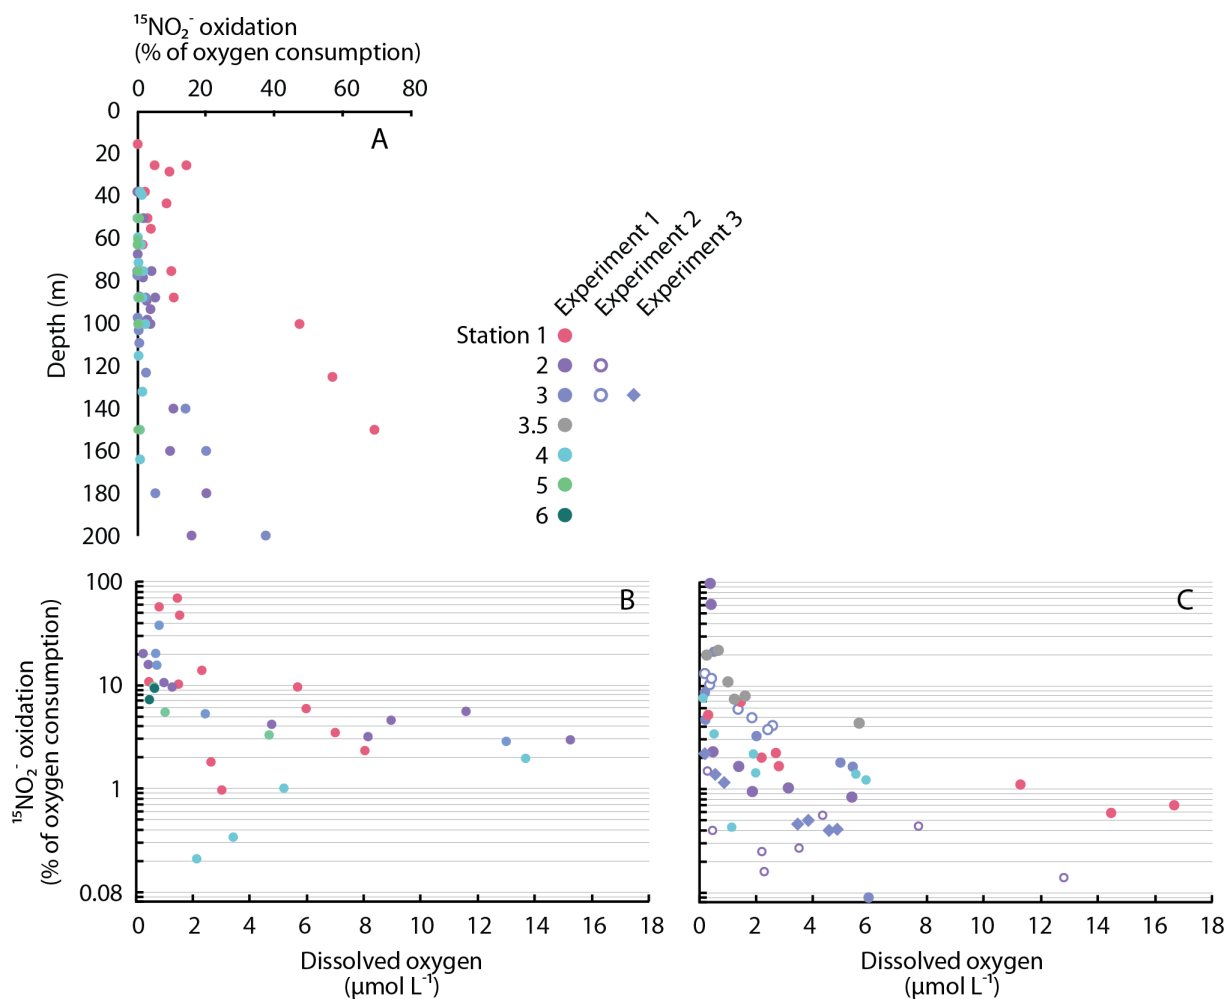

611

612

613 **Figure 3:** DO consumption via nitrite oxidation as a percentage of OCR with (A) depth, and as a  
614 function of DO in (B) depth profiles and (C) oxygen manipulation experiments. Colors denote  
615 different stations. Only measurements for DO <18  $\mu\text{M}$  are included in panel B. All  
616 experimental bottles with dual nitrite oxidation and OCR are shown in C; and different symbols  
617 denote different experiments.

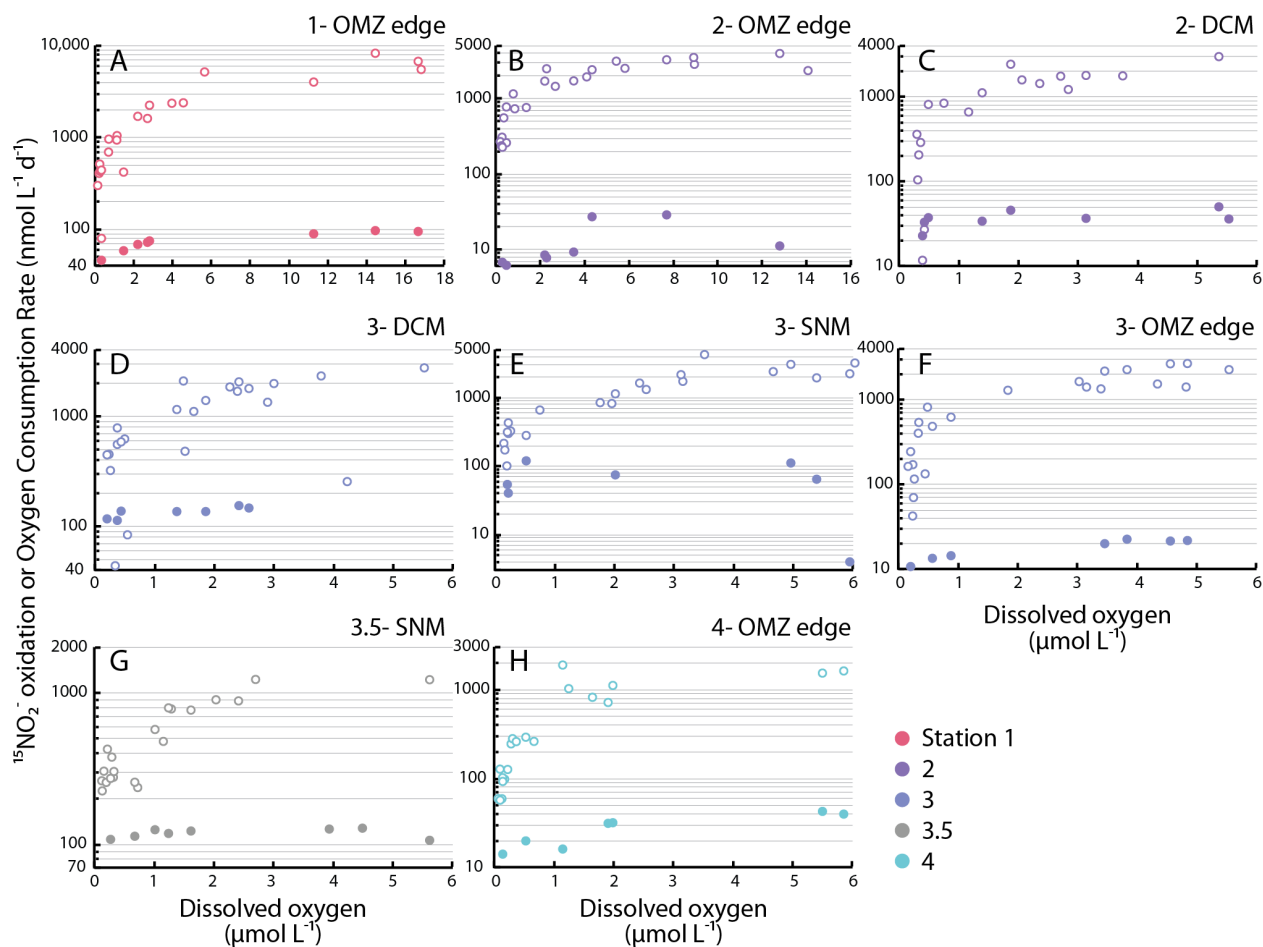

618

619

620 **Figure 4:** Nitrite oxidation rates (filled symbols) and OCR (open symbols) as a function of DO  
621 in oxygen manipulation experiments. Colors denote different stations, with panels displaying  
622 data from different experiments: A) Station 1 OMZ edge (20 μM DO), B) Station 2 OMZ edge,  
623 C) Station 2 DCM, D) Station 3 DCM, E) Station 3 SNM, F) Station 3 OMZ edge, G) Station 3.5  
624 SNM, and H) Station 4 OMZ edge. Note differences in vertical axes between experiments, and  
625 differences in horizontal axes in panels A and B compared with the remaining panels.



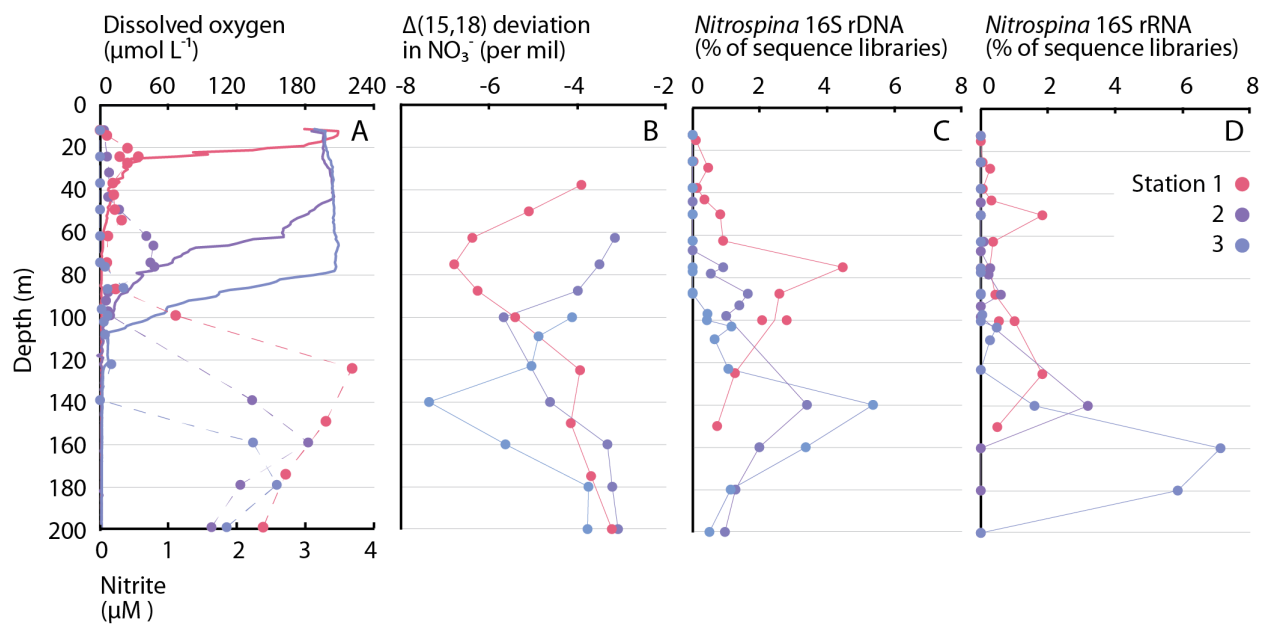

626

627

628 **Figure 5:** Depth profiles of (A) DO (solid lines) and nitrite (data points connected by dashed  
629 lines), (B)  $\Delta(15,18)$  dual-isotope deviations in nitrate, and *Nitrospina* ASVs as a percentage of  
630 (C) 16S rDNA sequence libraries and (D) 16S rRNA sequence libraries. Colors denote different  
631 sampling stations.

632 **Table 1:** Oxygen manipulation experiments and calculated parameters for OCR and nitrite  
 633 oxidation rates

634

| Sta. | Depth (m) | Type     | OCR                                 |            |       | Nitrite oxidation                   |               |       |
|------|-----------|----------|-------------------------------------|------------|-------|-------------------------------------|---------------|-------|
|      |           |          | $v_{\max}$<br>(nM d <sup>-1</sup> ) | $K_s$ (nM) | $r^2$ | $v_{\max}$<br>(nM d <sup>-1</sup> ) | $K_s$<br>(nM) | $r^2$ |
| 1    | 46        | OMZ edge | 12005                               | 13390      | .892  | 94.5                                | 611           | .861  |
| 2    | 90        | OMZ edge | 4164                                | 3262       | .878  | 23.3                                | 1876          | .347  |
| 2    | 140       | DCM      | 5426                                | 5674       | .811  | 43.9                                | 185           | .445  |
| 3    | 130       | DCM      | 2765                                | 18040      | .569  | 149                                 | 63.8          | .665  |
| 3    | 170       | SNM      | 5973                                | 6382       | .757  | 71.2                                | 38.4          | .019  |
| 3    | 110       | OMZ edge | 4025                                | 4247       | .868  | 23.0                                | 346           | .910  |
| 3.5  | 80        | SNM      | 1612                                | 1621       | .846  | 122                                 | 34.1          | .269  |
| 4    | 100       | OMZ edge | 2075                                | 1738       | .776  | 47.5                                | 1015          | .825  |

635

636 **Table 2:** Relative abundance of *Nitrospina* reads, functional genes from *Nitrospina*, and  
 637 *Prochlorococcus* reads within metagenomes (expressed per million reads)

638

| Sta. | Depth | Type        | <i>Nitrospina</i> | Nitrite<br>oxido-<br>reductase | Cyto-<br>chrome<br>c | Cyto-<br>chrome<br>bd | Chlorite<br>disumtase | <i>Prochloro-<br/>coccus</i> |
|------|-------|-------------|-------------------|--------------------------------|----------------------|-----------------------|-----------------------|------------------------------|
| 1    | 25    | OMZ<br>edge | 1084              | 2                              | 0                    | 0                     | 1                     | 865                          |
| 1    | 87.5  | DCM         | 31920             | 65                             | 14                   | 2                     | 11                    | 47992                        |
| 1    | 100   | SNM         | 21196             | 37                             | 22                   | 2                     | 7                     | 10765                        |
| 2    | 89    | OMZ<br>edge | 22442             | 38                             | 12                   | 10                    | 14                    | 57194                        |
| 2    | 130   | DCM         | 33290             | 57                             | 20                   | 4                     | 11                    | 33522                        |
| 2    | 160   | SNM         | 21725             | 37                             | 18                   | 2                     | 4                     | 4157                         |
| 3    | 123   | OMZ<br>edge | 18647             | 34                             | 10                   | 2                     | 11                    | 54709                        |
| 3    | 140   | DCM         | 34227             | 55                             | 18                   | 4                     | 12                    | 37202                        |
| 3    | 180   | SNM         | 17617             | 30                             | 17                   | 2                     | 4                     | 4881                         |

639
